# Supplementary material for: A ZnO nanowire/PANIPAM hybrid energy converter driven by temperature oscillation
Source: Royal Society of Chemistry journal article supplement (doi:10.1039/c5ra13983j), 2015-01-01
Supplement: c5ra13983j1.pdf [file c5ra13983j1.pdf]

## Supporting Information

### **A ZnO Nanowires/PANIPAM Hybrid Energy Converter Driven by Temperature Oscillation**

Quanhua Zhang<sup>†</sup>, Ding Wang<sup>†</sup>, Ying Xu, Pengpeng Wang, Xianying Wang\*

College of Materials Science and Engineering, University of Shanghai for Science &

Technology, Shanghai, 200093, People's Republic of China.

\* Corresponding author: [xianyingwang@usst.edu.cn](mailto:xianyingwang@usst.edu.cn) (Prof. X. Y. Wang)

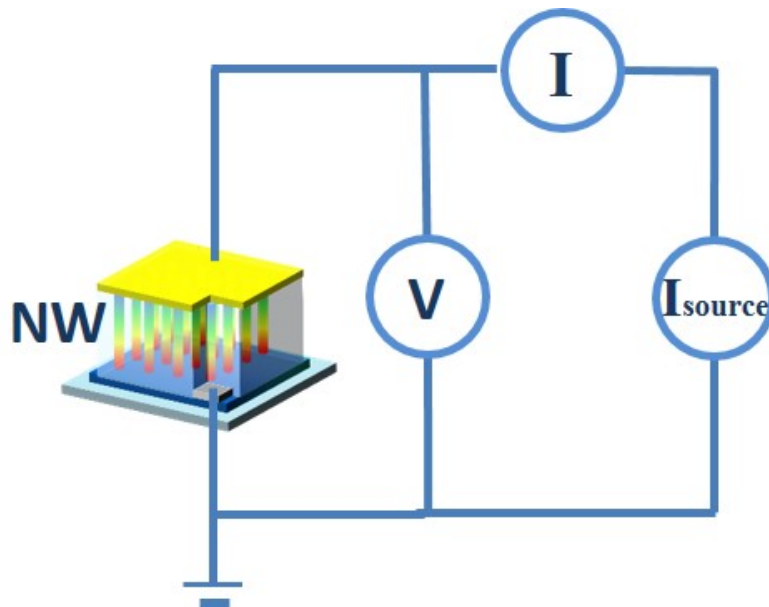

Fig. S1 The test circuit of nanoconverter.

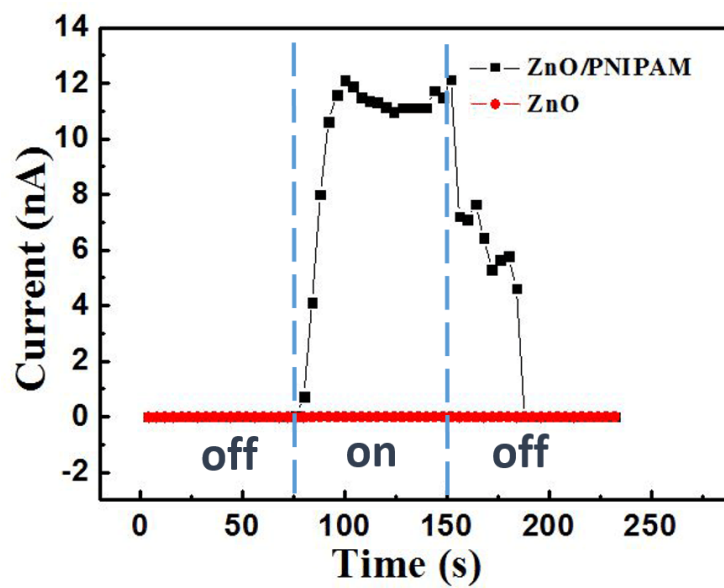

Fig. S2 Current responses of the ZnO/PNIPAM and ZnO NWs nanodevices under temperature variation from room temperature to  $\sim 8.4^\circ\text{C}$ .
